# Supplementary material
Source: publisher figshare collection journal article supplement (https://acs.figshare.com/ndownloader/files/4781278)

## Supporting Information 2

<sup>1</sup>H-NMR spectrum of compounds **2c~g** and **5c~g**.

YWA1400\data\Ytakamura\YdGC8IQ\prolQdG1H2.als

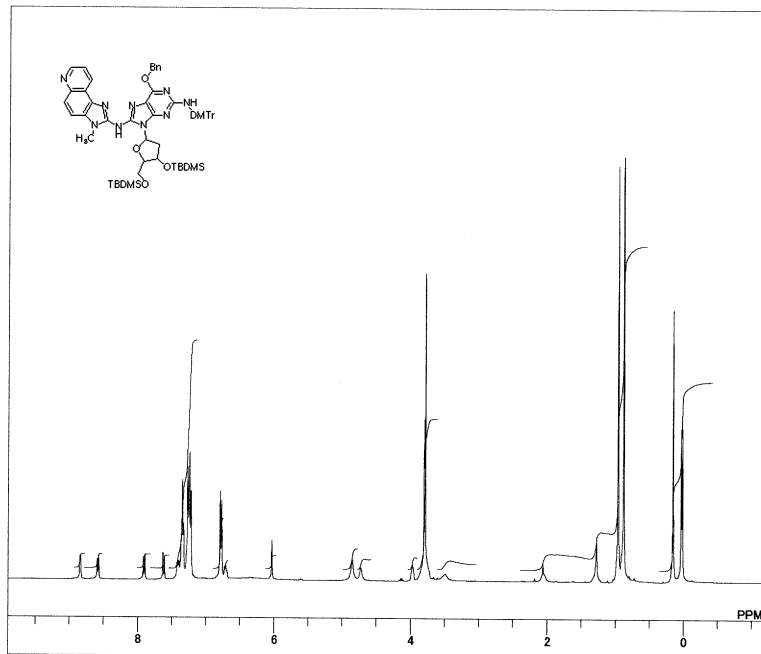

\\AI400\data\takamura\vdGC8IQ\vdGC8IQ1H2.als

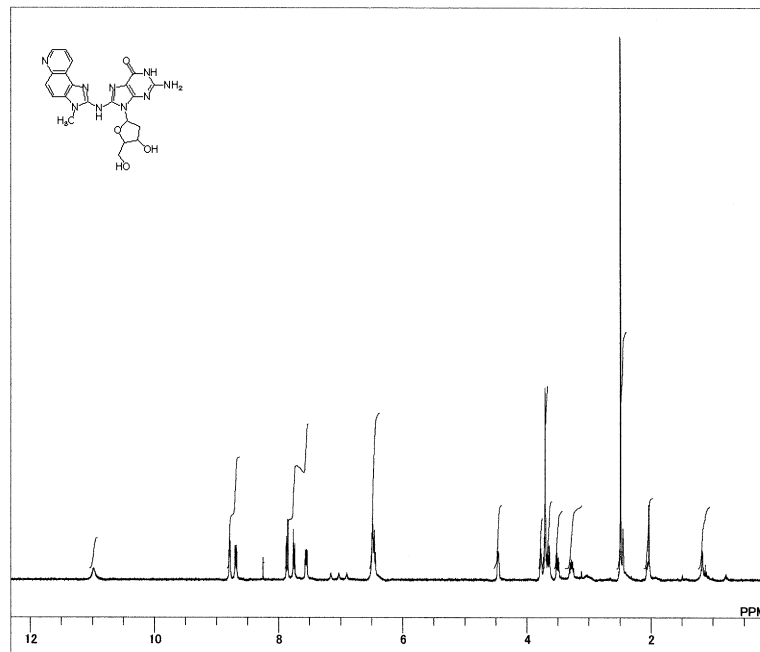

\\FAI400\data\Wakamura\4dG-C8-MelQx\1HMelQx-proDG.als

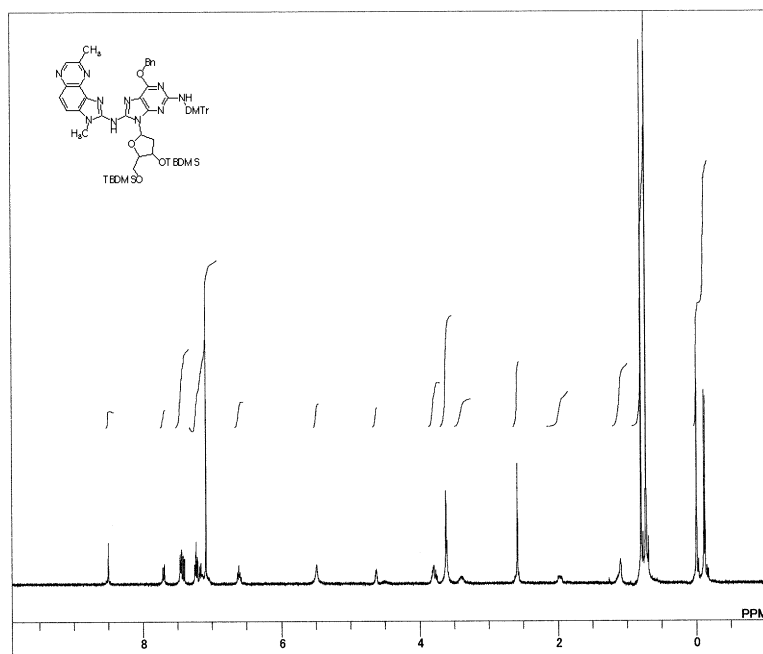

YVAI400\data\takamura\G-C8-MeIQx\MeIQx-dGC81H.als

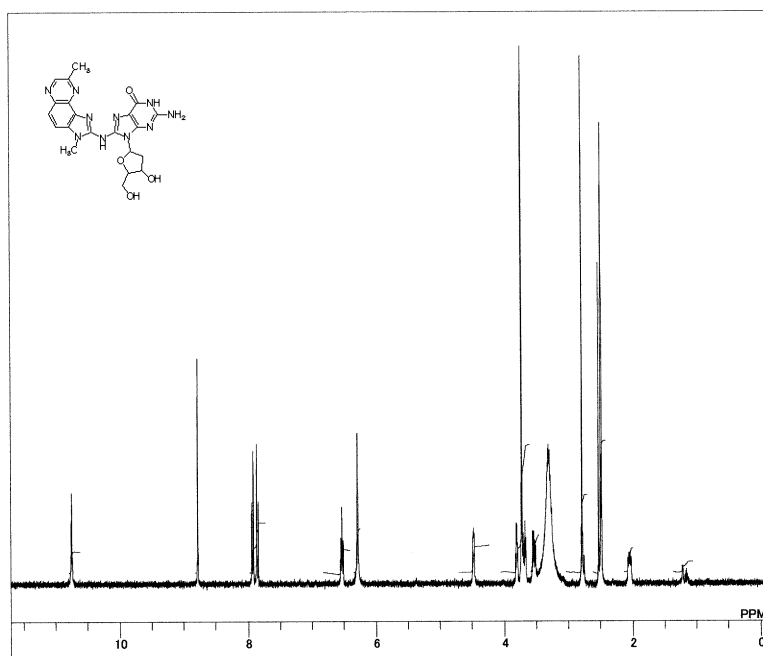

¥¥AI400¥data¥takamura¥dGC8glup1¥1h2.als

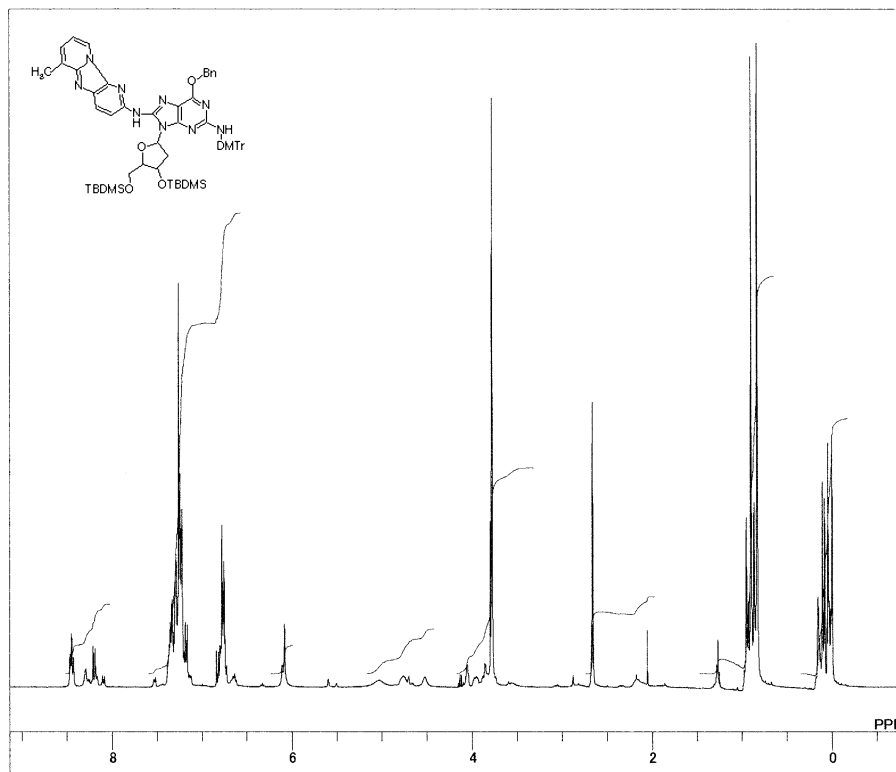

\\AI400\data\takamura\ddGC8glup1\ddGC8Glup11H2.als

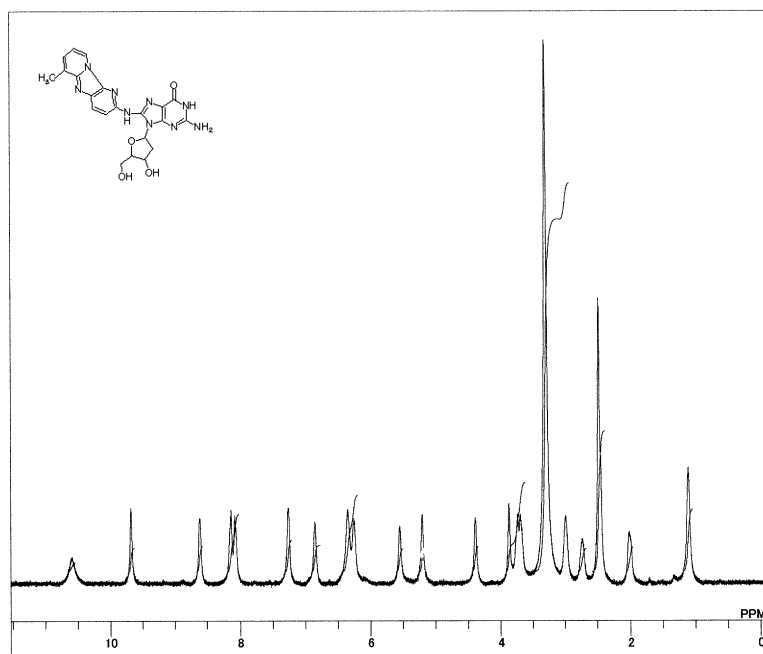

\\NAI400\data\takamura\4dG-C8-Trp-P1\1HTrp-P-1-prodG.als

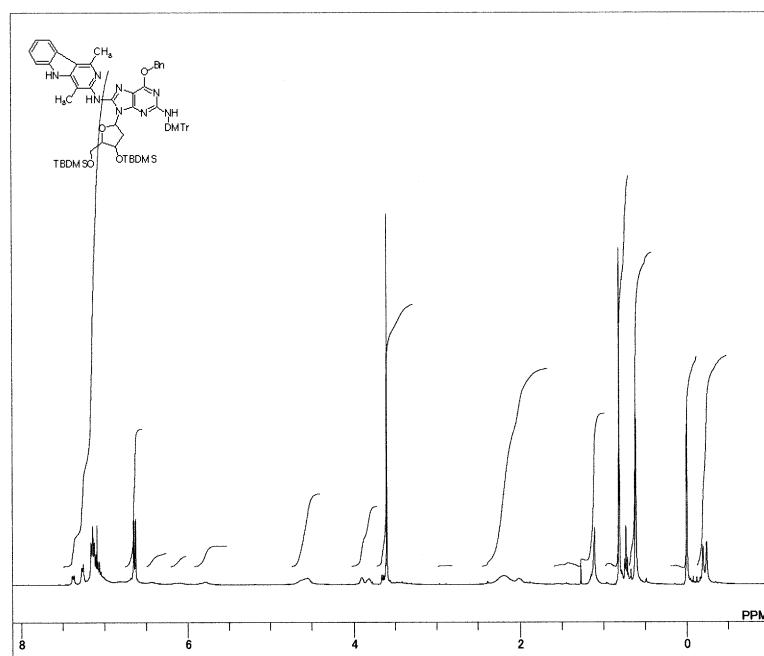



WVAI400\data\takamura\4dG-C8-Trp-P1\4dGC8Trp-P-11H.als

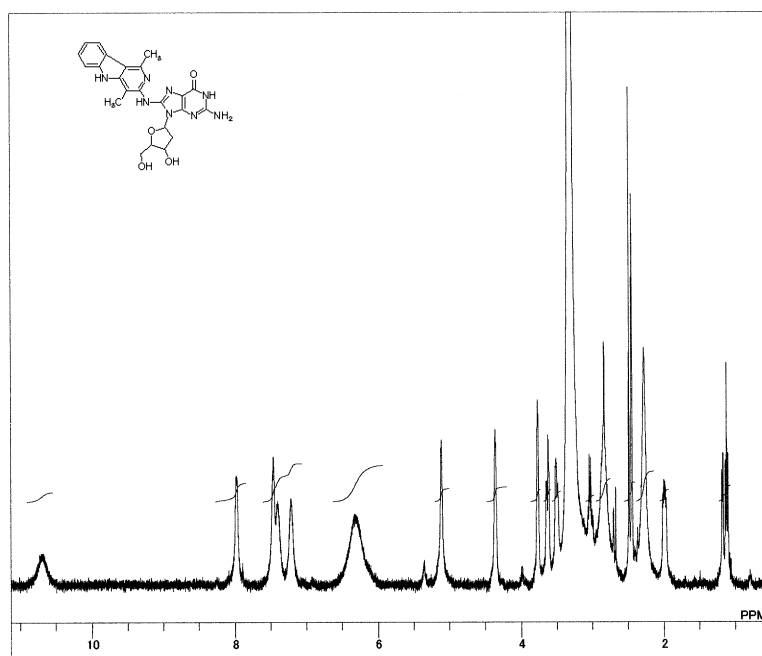

\\AI400\data\takamura\GC8PhIP\ProdG-C8-PhIP1H.sls  
CHCL3-pt1

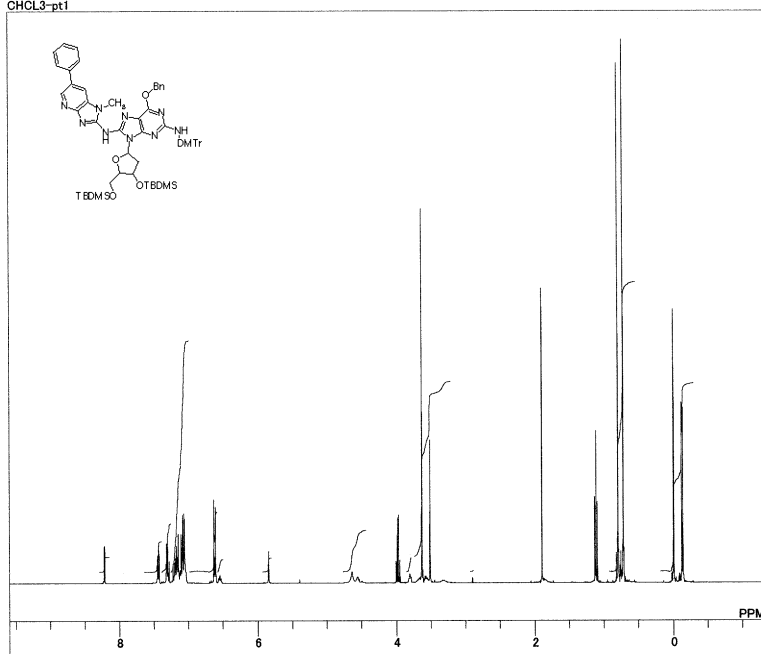

\\AI400\data\takamura\GC8PhIPyG-C8-PhIP1H.als

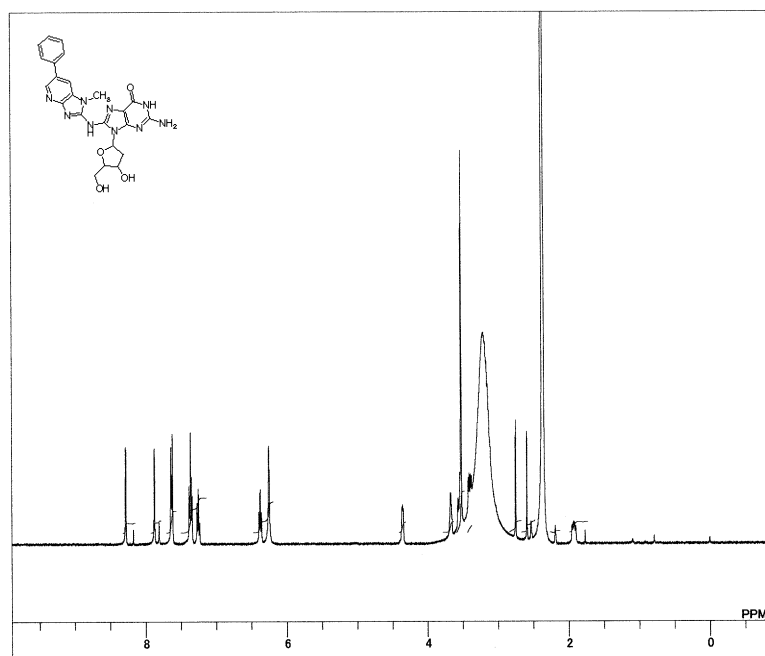

Supplement: Supplementary file 1 [file 4781278]
